# Building knowledge on adolescent health: reflections on the contribution of the Health Behaviour in School-aged Children (HBSC) study

Candace Currie, Aixa Y. Alemán-Díaz

Child and Adolescent Health Research Unit, University of St Andrews, St Andrews, Scotland KY16 9TF UK

**Correspondence:** Candace Currie, Child and Adolescent Health Research Unit, University of St Andrews, Medical and Biological Sciences Building, North Haugh, St Andrews, Scotland KY16 9TF UK. Tel: +44 (0)1334 461741, e-mail: cec53@st-andrews.ac.uk

Adolescence as a key stage in the life course has until quite recently been neglected by researchers and policymakers alike. Research on young people has largely focused on the early years of life, especially from pre-conception to age 5, with enormous investment in studying and intervening to improve wellbeing of young children. However, when ‘around 1 in 6 persons in the world is an adolescent’<sup>1</sup> it is impossible to neglect this age group. Reports like ‘The Lancet’ series on adolescent health,<sup>2–11</sup> UNICEF’s Progress for Children: a Report Card on Adolescents<sup>12</sup> and WHO’s Health for the World’s Adolescents report<sup>13</sup> shifted global attention and highlighted the importance of adolescence as a second critical period in development where investment and intervention is needed and valuable since it lays the foundation of good health in adulthood. McDaid et al.<sup>14</sup> have taken this argument a step further and provided the economic case for investment in adolescents. They demonstrate how available interventions during adolescence can generate substantial economic returns because they can mitigate the long-term adverse effects on health and other areas that result from poor wellbeing during childhood.

One study stands out as prescient in its focus on the adolescent years, the Health Behaviour in School-aged Children (HBSC) study, beginning its work 32 years ago to advance our understanding of young people entering the second decade of life. In the early eighties, HBSC researchers identified early through to middle adolescence as a critical period for the development of health and wellbeing, health behaviours and risk behaviours. They also understood, well before the concept became widely adopted, the need to consider these dimensions of health and behaviour as embedded within the fabric of the everyday lives of young people. The term used in the 1980s to describe this conceptual approach was ‘lifestyle,’ in the 90s ‘social context’ and in recent years, ‘social determinants’ has been adopted, but the underlying idea is the same. HBSC was ‘ahead of its time’ in formulating the perspective that adolescent health is both shaped and constrained by factors stemming from the social spheres of family, peers, school, and the wider economic conditions in which they are growing up.<sup>15</sup>

Since its inception, the HBSC has provided critical insight into the health and wellbeing of young people for a growing number of countries across Europe and North America. The cross-disciplinary nature of its conceptual and theoretical base, which has developed over time and continues to flourish today, has been a valuable source of research innovation in the field of adolescent health. In addition, the use of a common protocol has enabled the collection of comparative cross-national data amongst its participating countries; providing a platform for systematic data collection at the country level and a resource for national research capacity building. This has resulted in a coherent set of indicators that provide a valid representation of young people’s health, well-being and risk behaviours; as well as their developmental and social determinants.<sup>16</sup> The long

standing nature of this research collaboration has meant that, with successive surveys, trend data can be examined at the national and cross-national level as it is evident in this supplement enabling the identification of both emerging issues and continuing health challenges. Publications like this journal supplement underscore the value of the collected cross-national data in highlighting these issues. A further resource built over the last three decades is of human capital in the form of the HBSC network of researchers who through sustained collaboration have ensured the continuity and relevance of the study in advancing the health of the world’s adolescents. As such, the potential for HBSC to impact the lives of the young people it surveys is at a point where it extends beyond Europe and North America for example through the development of HBSC linked projects<sup>17</sup> and sharing of indicators with other global initiatives.<sup>18</sup> It is our hope that the following papers can inform health promotion and health education policy, programmes and practice aimed at young people at both national and international levels.

## Context

The HBSC study has grown exponentially over time both in absolute numbers of countries involved, scope of work, and impact. Initially, HBSC was a small collaboration of three countries and less than a dozen researchers. Today, 44 country teams form a research alliance and network of around 400 researchers across the European Region and North America. According to their expertise, network members align themselves to scientific and developmental groups within the study and this model has been successful in driving forward research innovation in the survey content. Each successive 4-year survey has included new topic areas, while at the same time maintaining core questions to enable tracking of trends in health and behaviour. National level data has been a critical resource for HBSC teams to use to draw attention to the particular health concerns among young people in their countries. This work has helped to build capacity for adolescent health at a country level, stimulating debate and discussion that can lead to strategic developments as well as channelling of funding towards further research. In turn, these processes have led to the building of a critical mass of researchers in the field of adolescent health.

## Knowledge exchange

Early publications were largely limited to national reports and journal articles which were descriptive in approach. For example, initial papers were national and focused on national prevalence of behaviours such as smoking<sup>19</sup> followed by papers making cross-national comparisons<sup>20,21</sup> using HBSC data. When they were published, this work made an important contribution to

adolescent public health science since very little data had been previously collected or published on the health of this population group in countries across Europe. It was some years before papers began to examine associations between behaviours<sup>22,23</sup> or between social factors and health outcomes.<sup>24</sup> In the last decade or so, the analyses presented in papers and reports have become more sophisticated and using macro-level measures at country-level we have had the opportunity for multi-level modelling and answering more complex research questions.<sup>25–28</sup> For example, how features of the country, such as economic, cultural and policy factors<sup>29–32</sup> provide explanations for country differences and patterns of change across time in young people's health. In 2009, the first Supplement on the HBSC study was published and it provided a complete description of the study's origins, history, conceptual framework and methodology.<sup>33</sup>

While HBSC has had as a primary aim since its initiation to influence policy and practice, over time there has been increasing effort among researchers and greater sophistication in products and activities to achieve these goals. Again the language has also changed; now we talk of the need for research impact tracked through measureable change in discourse or practice among decision makers. In the early years of HBSC the goal was to find ways to disseminate information to end users without a great deal of concern about the outcome of this information sharing to ascertain its effectiveness in changing policy agendas. However, the need for academics to demonstrate their commitment to serve the public good is now widely accepted, and furthermore attached to research funding, which has increased the imperative to take this work seriously and to commit time and consideration to doing it effectively. This has been a driver for HBSC to develop new ways to share its research findings with wide and differentiated stakeholder groups. Working hand in hand with its partner, WHO, there has been an effort to create attractive and accessible designs for reports, briefings, fact sheets<sup>16,34–37</sup> and events such as the WHO-HBSC Forums<sup>38–40</sup> which provided an information exchange platform to discuss and learn about how scientific evidence can impact practice, programmes and policy to improve young people's health. A new WHO Collaborating Centre for International Child and Adolescent Health Policy has also recently been established at the University of St Andrews<sup>41</sup> and one of its aims is to assist HBSC in bridging the gap between research and policy, which will include developing novel approaches to engaging with stakeholder groups. New technology is also being used by HBSC through developing interactive data visualisations<sup>42</sup> to display our findings in more engaging ways and attract users to manipulate the data to create their own 'stories' to convince decision makers of the need for action.

The HBSC study has been instrumental in increasing the production of data on adolescents and making it available for researchers and policy makers, with a new data portal soon to be launched. The breadth of its topics and cross-national nature offer a convenient snapshot into the factors that contribute to creating the best conditions for young people to grow up in different country contexts and how they fare against others. But data alone will not create change, especially if it does not get into the hands of decision makers who determine funding levels and government priorities. Through a wide range of knowledge exchange activities, HBSC teams have engaged with stakeholders to help identify priorities for government action. One such example has been the work with organisations such as UNICEF using evidence from HBSC to raise awareness of specific issues such as the damaging effects of poverty and economic inequalities on children's health.<sup>43–44</sup> This supplement is another opportunity to make HBSC trend data and analysis accessible and informative to ensure that it can positively affect policies and programmes that aim to realise young people's potential for health, development and wellbeing.

## Acknowledgements

The Health Behaviour in School-aged Children (HBSC) study is an international study carried out in collaboration with the WHO/Europe. The international coordinator of the study was Candace Currie, University of St. Andrews, Scotland. The data bank manager of the study was Oddrun Samdal, University of Bergen, Norway. A complete list of participating countries and researchers is available on the HBSC website (<http://www.hbsc.org>). Candace Currie has been HBSC International Coordinator since 1995; Aixa Y. Alemán-Díaz was Assistant International Network Coordinator 2011–2013. The authors would like to acknowledge the HBSC Study Network, the WHO Regional Office for Europe and HBSC funders as well as all the young people who have participated in HBSC over the years.

## Funding

The data collection for each HBSC survey is funded at the national level. NHS Health Scotland funded the work of the HBSC International Coordinating Centre from 1995 to 2013. Additionally countries in the study network make a contribution to the international study through a subscription system.

*Conflicts of Interest:* None declared.

## Key points

- HBSC researchers identified early through to middle adolescence as a critical period for the development of health and wellbeing, health behaviours and risk behaviours well before it was widely accepted.
- The use of a common protocol has enabled the collection of comparative cross-national data amongst its participating countries, providing a platform for systematic data collection at the country level.
- The long-standing collaboration has enabled a flourishing network of adolescent health experts and a rich resource for national research capacity building.
- HBSC has a primary aim to influence policy and practice; over time there has been increasing effort among researchers and greater sophistication in products and activities to achieve this goal.

## References

- 1 Adolescents: health risks and solutions. Geneva (CHE): WHO; 2014 May. Fact sheet No. 345. Available at: <http://www.who.int/mediacentre/factsheets/fs345/en/> (5 November 2014, date last accessed).
- 2 Kleinert S. Adolescent health: an opportunity not to be missed. *The Lancet* 2007;369:1057.
- 3 Resnick MD, Bowes G. Us and them: worldwide health issues for adolescents. *The Lancet* 2007;369:1058.
- 4 Patton GC, Viner R. Pubertal transitions in health. *The Lancet* 2007;369:1130–9.
- 5 Editors. Putting adolescents at the centre of health and development. *The Lancet* 2012;379:1561.
- 6 Resnick MD, Catalano RF, Sawyer SM, et al. Seizing the opportunities of adolescent health. *The Lancet* 2012;379:1564–6.
- 7 Blum RW, Bastos FIPM, Kabiru CW, et al. Adolescent health in the 21st century. *The Lancet* 2012;379:1567–8.
- 8 Sawyer SM, Afifi RA, Bearinger LH, et al. Adolescence: a foundation for future health. *The Lancet* 2012;379:1630–40.
- 9 Viner RM, Ozer EM, Denny S, et al. Adolescence and the social determinants of health. *The Lancet* 2012;379:1641–52.

- 10 Catalano RF, Fagan AA, Gavin LE, et al. Worldwide application of prevention science in adolescent health. *The Lancet* 2012;379:1653–64.
- 11 Patton GC, Coffey C, Cappa C, et al. Health of the world's adolescents: a synthesis of internationally comparable data. *The Lancet* 2012;379:1665–75.
- 12 Progress for Children: A report card on adolescents. New York (NY): UNICEF; 2012 April. No. 10.
- 13 Health for the World's Adolescents: A Second Chance in the Second Decade. Geneva (CHE): WHO; 2014. Available at: <http://apps.who.int/adolescent/second-decade/> (5 November 2014, date last accessed).
- 14 McDaid D, Park A, Currie C, et al. Investing in the wellbeing of young people: making the economic case. In: McDaid D, Cooper C, editors. *Economics of Wellbeing. Wellbeing: A Complete Reference Guide* (Vol. 5). Oxford: Wiley-Blackwell, 2014: 181–214.
- 15 Aaro LE, Wold B, Kannas L, et al. Health behaviour in school-children. A WHO cross-national survey. *Health Promotion Int* 1986;1:17–33.
- 16 Currie C, Zannotti C, Morgan A, et al., editors. *Social determinants of health and well-being among young people. Health Behaviour in School-aged Children (HBSC) study: international report from the 2009/2010 survey*. Copenhagen (DNK): WHO Regional Office for Europe; 2012. Health Policy for Children and Adolescents. No.: 6.
- 17 Health Behaviour in School-aged Children (HBSC) study, a WHO Collaborative Study—Linked Projects. Available at: <http://www.hbsc.org/membership/linkedprojects/index.html> (6 November 2014, date last accessed).
- 18 Patton, George C, et al. Health of the world's adolescents: a synthesis of internationally comparable data. *The Lancet* 2012;379:1665–75.
- 19 Smith C, Nutbeam D, Roberts C, et al. Current changes in smoking attitudes and behaviours among adolescents in Wales, 1986–1992. *J Public Health Med* 1994;16:165–171.
- 20 Wold B, Kannas L. Sport motivation among young adolescents in Finland, Norway and Sweden. *Scand J Med Sci Sports* 1993;3:283–91.
- 21 Harel Y. A cross-national study of youth violence in Europe. *Int J Adolescent Med Health* 1999;11:121–34.
- 22 Pötsönen R, Kontula O. How are attitudes towards condoms related to gender and sexual experiences among adolescents in Finland? *Health Promotion Int* 1999;14:211–9.
- 23 Pickett W, Schmid H, Boyce WF, et al. Multiple risk behaviours and injury: An International Analysis of Young People. *Arch Pediatrics Adolescent Med* 2002;156:786–93.
- 24 Mazur J, Scheidt PC, Overpeck MD, et al. Adolescent injuries in relation to economic status: an international perspective. *Injury Control Saf Promotion* 2001;8:179–82.
- 25 Maes L, Lievens J. Can the school make a difference? A multilevel analysis of adolescent risk and health behaviour. *Soc Sci Med* 2003;56:517–29.
- 26 Torsheim T, Currie C, Boyce W, et al. Country material distribution and adolescents' perceived health: multilevel study of adolescents in twenty-seven countries. *J Epidemiol Commun Health* 2006;60:156–61.
- 27 Elgar FJ, De Clercq B, Schnohr CW, et al. Absolute and relative family affluence and psychosomatic symptoms in adolescents. *Soc Sci Med* 2013;91:25–31.
- 28 Madkour AS, de Looze M, Ma P, et al. Macro-level age norms for the timing of sexual initiation and adolescents' early sexual initiation in 17 European countries. *J Adolescent Health* 2014;55:114–26.
- 29 Elgar FJ, Pfoertner TJ, Moor I, et al. Widening socioeconomic inequalities in adolescent health: a time series analysis of 34 countries participating in the HBSC study, 2002 to 2010. *The Lancet*. In press.
- 30 Pfoertner TK, Rathmann K, Elgar FJ, et al. Adolescents' psychological health complaints and the economic recession in late 2007: a multilevel study in 31 countries. *Eur J Public Health* 2014;24:960–6.
- 31 Ter Bogt T, Schmid H, Nic Gabhainn S, et al. Economic and cultural correlates of cannabis use among mid-adolescents in 31 countries. *Addiction* 2006;101:241–51.
- 32 Zambon A, Boyce W, Cois E, et al. Do welfare regimes mediate the effect of socioeconomic position on health in adolescence? A cross-national comparison in Europe, North America and Israel. *Int J Health Serv* 2006;36:309–29.
- 33 International Journal of Public Health 2009; 54. Available at: <http://link.springer.com/journal/38/54/2/suppl/page/1> (6 November 2014, date last accessed).
- 34 Currie C, Hurrelmann K, Settertobulte W, et al, editors. *Health and health behaviour among young people: Health Behaviour in School-aged Children*. Copenhagen (DNK): WHO Regional Office for Europe; 2000. Health Policy for Children and Adolescents. No.: 1.
- 35 Currie C, Roberts C, Morgan A, et al, editors. *Young People's Health in Context, Health Behaviour in School-aged Children study: International Report from the 2001/2002 Survey*. Copenhagen (DNK): WHO Regional Office for Europe; 2004. Health Policy for Children and Adolescents. No.: 4.
- 36 Currie C, Nic Gabhainn S, Godeau, et al, editors. *Inequalities in young people's health: international report from the HBSC 2005/06 survey*. Copenhagen (DNK): WHO Regional Office for Europe; 2008. Health Policy for Children and Adolescents. No.: 5.
- 37 Health Behaviour in School-aged Children (HBSC) study, a WHO Collaborative Study – Fact Sheets. Available at: <http://www.hbsc.org/publications/factsheets/> (6 November 2014, date accessed last).
- 38 Addressing the socioeconomic determinants of healthy eating habits and physical activity levels among adolescents. Copenhagen (DNK): WHO Regional Office for Europe; 2006.
- 39 Social cohesion for mental well-being among adolescents: Report from the 2007 WHO/HBSC Forum. Copenhagen (DNK): WHO Regional Office for Europe; 2008.
- 40 Socio-environmentally determined health inequities among children and adolescents. Copenhagen (DNK): WHO Regional Office for Europe; 2010.
- 41 WHO Collaborative Centre for International Child and Adolescent Health Policy. Available at: <http://www.whoccstandrews.org>. (6 November 2014, date accessed last).
- 42 Health Behaviour in School-aged Children (HBSC) study, a WHO Collaborative Study – Data visualisations. Available at: <http://www.hbsc.org/publications/datavisualisations/> (6 November 2014, date accessed last).
- 43 An overview of child well-being in rich countries. Florence (ITA): UNICEF Innocenti Research Centre; 2007. Report Card No. 7.
- 44 The Children Left Behind. Florence (ITA): UNICEF Innocenti Research Centre; 2010. Report Card No. 9.
